# Supplementary material for: Reversible photomechanical actuators with liquid crystal polymer graphene oxide nanocomposites
Source: Royal Society of Chemistry journal article supplement (doi:10.1039/d4tc04063e), 2024-11-26
Supplement: d4tc04063e1.pdf [file d4tc04063e1.pdf]

## Electronic Supplementary Information (ESI) for:

### Exploring Reversible Photomechanical Actuators with Liquid Crystal Polymer Graphene Oxide Nanocomposites

Guan-Ting Li<sup>‡,a</sup>, Chia-Hsien Hsu<sup>a,b</sup>, Bhupendra Pratap Singh<sup>‡,c</sup> and Shug-June Hwang<sup>\*a,c</sup>

<sup>a</sup>International Master Program of Translational Medicine, National United University, Miaoli, Taiwan

<sup>b</sup>Institute of Biomedical Engineering and Nanomedicine, National Health Research Institutes, Miaoli, Taiwan

<sup>c</sup>Department of Electro-Optical Engineering, National United University, Miaoli, Taiwan

Corresponding Author: [\\*june@nuu.edu.tw](mailto:*june@nuu.edu.tw)

#### Determination of the Optimal Thickness for the LCP

In the pursuit of determining the most suitable thickness for the liquid crystal polymer (LCP), three different LCP films were systematically investigated. Three distinct thickness categories were prepared: low (18  $\mu\text{m}$ ), medium (70  $\mu\text{m}$ ), and high (150  $\mu\text{m}$ ), for the LCPs.

The LCP with a thickness of 18  $\mu\text{m}$  was found to be excessively thin and soft, resulting in inadequate pushing force and poor reversibility. Although easily activated by light, this evaluation rendered it unsuitable for optical actuator fabrication (see Fig. S1(a)).

Upon measurement with Polarized Optical Microscopy (POM), the LCP prepared with 70  $\mu\text{m}$  thick double tape was determined to be approximately 60  $\mu\text{m}$  thick. This LCP exhibited moderate structural softness and hardness, facile photo-induced deformation, and a satisfactory reversible effect (see Fig. S1(b)).

However, the LCP fabricated using double-sided tape with a thickness of 150  $\mu\text{m}$  measured approximately 145  $\mu\text{m}$  with POM. This LCP demonstrated a stronger structure, reduced susceptibility to deformation, albeit with poor reversibility, and necessitated a relatively high driving optical power (see Fig. S1(c)).

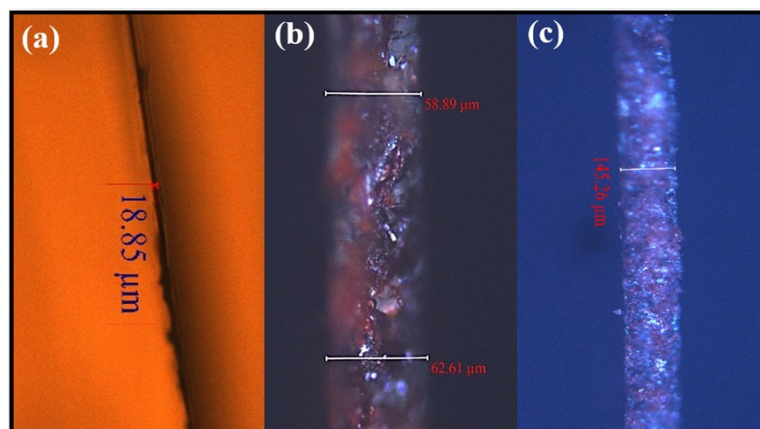

**Figure S1.** Measurement of LCP thicknesses: (a) 18  $\mu\text{m}$ , (b) 70  $\mu\text{m}$ , and (c) 150  $\mu\text{m}$ , as determined using Polarized Optical Microscopy (POM).
